# Supplementary material
Source: HighWire-hosted journal article supplement (http://www.cmaj.ca/highwire/filestream/58298/field_highwire_adjunct_files/0/resp-falagas-1-at.pdf)
Supplement: resp-falagas-1-at.pdf [file resp-falagas-1-at.pdf]

**Appendix 1:** Outcomes of the randomized controlled trials included in the meta-analysis of the effectiveness of respiratory fluoroquinolones compared with other antibiotics for the treatment of community acquired pneumonia

| Study                             | Duration of hospital stay, d, mean (SD) or median (range) | Mortality (all cause), n/N (%) | Intention-to-treat population   | Treatment success; n/N (%)      |                                 |                                     |
|-----------------------------------|-----------------------------------------------------------|--------------------------------|---------------------------------|---------------------------------|---------------------------------|-------------------------------------|
|                                   |                                                           |                                |                                 | Clinically evaluable population |                                 |                                     |
|                                   |                                                           |                                |                                 | Overall                         | Combination therapy             | Severe community-acquired pneumonia |
| Carbon et al <sup>1</sup>         | NA                                                        | 0/348 (0)<br>v. 2/168 (1)      | 286/348 (82)<br>v. 144/168 (86) | 275/291 (95)<br>v. 141/148 (95) | NA                              | NA                                  |
| D'Ignazio et al <sup>2</sup>      | NA                                                        | 2/212 (1)<br>v. 1/211 (0.5)    | 189/212 (89)<br>v. 180/211 (85) | 177/189 (94)<br>v. 156/174 (90) | NA                              | NA                                  |
| Erard et al <sup>3</sup>          | median 8 (2-74)<br>v. 10 (3-29)                           | 1/79 (1)<br>v. 3/37 (8)        | NA                              | 72/79 (91)<br>v. 34/37 (92)     | 72/79 (91)<br>v. 18/20 (90)     | 28/28 (100)<br>v. 14/14 (100)       |
| File et al <sup>4</sup>           | NA                                                        | 1/291 (0.3)<br>v. 5/293 (2)    | NA                              | 217/226 (96)<br>v. 208/230 (90) | NA                              | NA                                  |
| Finch et al <sup>5</sup>          | mean (SD)<br>9.5 ± 7.3<br>v. 10.4 ± 7.5                   | 9/301 (3)<br>v. 17/321 (5)     | NA                              | 241/258 (93)<br>v. 239/280 (85) | 241/258 (93)<br>v. 144/168 (86) | NA                                  |
| Fogarty et al <sup>6</sup>        | NA                                                        | 15/132 (11)<br>v. 9/137 (7)    | 96/132 (73)<br>v. 88/137 (64)   | 85/95 (90)<br>v. 74/89 (83)     | 85/95 (90)<br>v. 74/89 (83)     | 16/19 (84)<br>v. 12/19 (63)         |
| Fogarty et al <sup>7</sup>        | NA                                                        | NA                             | 219/235 (93)<br>v. 221/238 (93) | 184/194 (95)<br>v. 178/188 (95) | NA                              | NA                                  |
| Frank et al <sup>8</sup>          | NA                                                        | 2/113 (2)<br>v. 4/118 (3)      | 95/106 (90)<br>v. 90/105 (86)   | 80/85 (94)<br>v. 72/78 (92)     | NA                              | NA                                  |
| Geijo Martinez et al <sup>9</sup> | mean 10.9<br>v.13.8                                       | 1/20 (5) v. 1/29 (3)           | NA                              | 19/20 (95)<br>v. 26/29(90)      | NA                              | NA                                  |
| Gotfried et al <sup>10</sup>      | NA                                                        | NA                             | NA                              | 107/124 (86)<br>v. 113/128 (88) | NA                              | NA                                  |
| Hoeffken et al <sup>11</sup>      | NA                                                        | 7/453 (2)<br>v. 5/222 (2)      | NA                              | 336/357 (94)<br>v. 164/174 (94) | NA                              | NA                                  |
| Kalbermatter et al <sup>12</sup>  | NA                                                        | NA                             | NA                              | 27/28 (96)<br>v. 52/56 (93)     | NA                              | NA                                  |
| Katz et al <sup>13</sup>          | NA                                                        | 10/167 (6)<br>v. 7/168 (4)     | 93/111 (84)<br>v. 93/116 (80)   | 90/108 (83)<br>v. 90/113 (80)   | 90/108 (83)<br>v. 58/75 (77)    | 20/27 (74)<br>v. 18/26 (69)         |
| Leophonte et al <sup>14</sup>     | NA                                                        | 4/167 (2)<br>v. 3/153 (2)      | 143/167 (86)<br>v. 128/153 (84) | 122/128 (95)<br>v. 109/121 (90) | NA                              | 26/26 (100)<br>v. 23/26 (88)        |
| Lin et al <sup>15</sup>           | mean 7.4 ± 3.1<br>v. 6.8 ± 2.1                            | NA                             | 18/26 (69)<br>v. 17/24 (71)     | 18/23 (78)<br>v. 17/22 (77)     | 18/23 (78)<br>v. 17/22 (77)     | NA                                  |
| Lode et al <sup>16</sup>          | median 8 (1-32)<br>v. 9 (1-45)                            | 3/169 (2)<br>v. 6/172 (3)      | NA                              | 118/123 (96)<br>v. 124/129 (96) | NA                              | 20/23 (87)<br>v. 20/24 (83)         |
| Norrby et al <sup>17</sup>        | median<br>11 v. 13                                        | 21/314 (7)<br>v. 22/305 (7)    | 239/314 (76)<br>v. 229/305 (75) | 105/127 (83)<br>v. 113/139 (81) | NA                              | NA                                  |
| Petitpretz et al <sup>18</sup>    | NA                                                        | 3/200 (2)<br>v. 4/208 (2)      | 173/200 (87)<br>v. 171/208 (82) | 162/177 (92)<br>v. 166/185 (90) | NA                              | NA                                  |
| Portier et al <sup>19</sup>       | NA                                                        | 6/171 (4)<br>v. 7/175 (4)      | 142/171 (83)<br>v. 136/175 (78) | 131/151 (87)<br>v. 120/138 (87) | NA                              | NA                                  |
| Torres et al <sup>20</sup>        | median 7 (2-49)<br>v. 7 (2-30)                            | 4/274 (2)<br>v. 5/279 (2)      | 218/233 (94)<br>v. 229/244 (94) | 201/215 (94)<br>v. 217/231 (94) | 201/215 (94)<br>v. 134/143 (94) | 41/45 (91)<br>v. 31/37 (84)         |
| Welte et al <sup>21</sup>         | median 9 v. 11                                            | 6/200 (3)<br>v. 7/197 (4)      | 150/200 (75)<br>v. 140/197 (71) | 138/161 (86)<br>v. 135/156 (87) | NA                              | 21/27 (78)<br>v. 19/27 (70)         |
| Xu et al <sup>22</sup>            | NA                                                        | NA                             | 18/20 (90)<br>v. 19/20 (95)     | 18/20 (90)<br>v. 19/20 (95)     | 18/20 (90)<br>v. 19/20 (95)     | NA                                  |
| Zervos et al <sup>23</sup>        | mean 8.4 ± 6.9<br>v. 7.7 ± 4.7                            | 5/102 (5)<br>v. 3/110 (3)      | 83/93 (89)<br>v. 85/97 (88)     | 67/75 (89)<br>v. 75/82 (92)     | NA                              | NA                                  |

Note: NA = not available

## References:

1. Carbon C, Ariza H, Rabie WJ, et al. Comparative study of levofloxacin and amoxicillin/clavulanic acid in adults with mild-to-moderate community-acquired pneumonia. *Clin Microbiol Infect* 1999;5:724-32.
2. D'Ignazio J, Camere MA, Lewis DE, et al. Novel, single-dose microsphere formulation of azithromycin versus 7-day levofloxacin therapy for treatment of mild to moderate community-acquired pneumonia in adults. *Antimicrob Agents Chemother* 2005;49:4035-41.
3. Erard V, Lamy O, Bochud PY, et al. Full-course oral levofloxacin for treatment of hospitalized patients with community-acquired pneumonia. *Eur J Clin Microbiol Infect Dis* 2004;23:82-8.
4. File TM Jr, Segreti J, Dunbar L, et al. A multicenter, randomized study comparing the efficacy and safety of intravenous and/or oral levofloxacin versus ceftriaxone and/or cefuroxime axetil in treatment of adults with community-acquired pneumonia. *Antimicrob Agents Chemother* 1997;41:1965-72.
5. Finch R, Schurmann D, Collins O, et al. Randomized controlled trial of sequential intravenous (i.v.) and oral moxifloxacin compared with sequential i.v. and oral co-amoxiclav with or without clarithromycin in patients with community-acquired pneumonia requiring initial parenteral treatment. *Antimicrob Agents Chemother* 2002;46:1746-54.
6. Fogarty C, Siami G, Kohler R, et al. Multicenter, open-label, randomized study to compare the safety and efficacy of levofloxacin versus ceftriaxone sodium and erythromycin followed by clarithromycin and amoxicillin-clavulanate in the treatment of serious community-acquired pneumonia in adults. *Clin Infect Dis* 2004;38(Suppl 1):S16-23.
7. Fogarty C, Grossman C, Williams J, et al. Efficacy and safety of moxifloxacin vs clarithromycin for community-acquired pneumonia. *Infect Med* 1999;16:748-63.
8. Frank E, Liu J, Kinasewitz G, et al. A multicenter, open-label, randomized comparison of levofloxacin and azithromycin plus ceftriaxone in hospitalized adults with moderate to severe community-acquired pneumonia. *Clin Ther* 2002;24:1292-308.
9. Geijo Martinez MP, Diaz de Tuesta Chow-Quan AM, Herranz CR, et al. Levofloxacin versus beta-lactamic therapy in community acquired pneumonia that requires hospitalization. *Med Interna* 2002;19:621-5.
10. Gotfried MH, Dattani D, Riffer E, et al. A controlled, double-blind, multicenter study comparing clarithromycin extended-release tablets and levofloxacin tablets in the treatment of community-acquired pneumonia. *Clin Ther* 2002;24:736-51.
11. Hoeffken G, Meyer HP, Winter J, et al.; Community-acquired Pneumonia Study Group. The efficacy and safety of two oral moxifloxacin regimens compared to oral clarithromycin in the treatment of community-acquired pneumonia. *Respir Med* 2001;95:553-64.
12. Kalbermatter V, Bagilet D, Diab M, et al. Oral levofloxacin versus intravenous ceftriaxone and amoxicillin/clavulanic acid in the treatment of community-acquired pneumonia that requires hospitalization. *Med Clin (Barc)* 2000;115:561-3.
13. Katz E, Larsen LS, Fogarty CM, et al. Safety and efficacy of sequential i.v. to p.o. moxifloxacin versus conventional combination therapies for the treatment of community-acquired pneumonia in patients requiring initial i.v. therapy. *J Emerg Med* 2004;27:395-405.
14. Leophonte P, File T, Feldman C. Gemifloxacin once daily for 7 days compared to amoxicillin/clavulanic acid thrice daily for 10 days for the treatment of community-acquired pneumonia of suspected pneumococcal origin. *Respir Med* 2004;98:708-20.
15. Lin TY, Lin SM, Chen HC, et al. An open label randomized comparison of levofloxacin and amoxicillin/clavulanate plus clarithromycin for the treatment of hospitalized patients with community-acquired pneumonia. *Chang Gung Med J* 2007;30:321-32.
16. Lode H, File TM Jr, Mandell L, et al.; 185 Gemifloxacin Study Group. Oral gemifloxacin versus sequential therapy with intravenous ceftriaxone/oral cefuroxime with or without a macrolide in the treatment of patients hospitalized with community-acquired pneumonia: a randomized, open-label, multicenter study of clinical efficacy and tolerability. *Clin Ther* 2002;24:1915-36.
17. Norrby SR, Petermann W, Willcox PA, et al. A comparative study of levofloxacin and ceftriaxone in the treatment of hospitalized patients with pneumonia. *Scand J Infect Dis* 1998;30:397-404.
18. Petitpretz P, Arvis P, Marel M, et al.; CAP5 Moxifloxacin Study Group. Oral moxifloxacin vs high-dosage amoxicillin in the treatment of mild-to-moderate, community-acquired, suspected pneumococcal pneumonia in adults. *Chest* 2001;119:185-95.

Appendix to: Vardakas KZ, Siempos II, Grammatikos A, et al. Respiratory fluoroquinolones for the treatment of community-acquired pneumonia: a meta-analysis of randomized controlled trials. *CMAJ* 2008;179:1269-77. Copyright © 2008, Canadian Medical Association.

19. Portier H, Brambilla C, Garre M, et al. Moxifloxacin monotherapy compared to amoxicillin-clavulanate plus roxithromycin for nonsevere community-acquired pneumonia in adults with risk factors. *Eur J Clin Microbiol Infect Dis* 2005;24:367-76.
20. Torres A, Muir JF, Corris P, et al. Effectiveness of oral moxifloxacin in standard first-line therapy in community-acquired pneumonia. *Eur Respir J* 2003;21:135-43.
21. Welte T, Petermann W, Schurmann D, et al.; MOXIRAPID Study Group. Treatment with sequential intravenous or oral moxifloxacin was associated with faster clinical improvement than was standard therapy for hospitalized patients with community-acquired pneumonia who received initial parenteral therapy. *Clin Infect Dis* 2005;41:1697-705.
22. Xu S, Xiong S, Xu Y, et al. Efficacy and safety of intravenous moxifloxacin versus cefoperazone with azithromycin in the treatment of community acquired pneumonia. *J Huazhong Univ Sci Technol Med Sci* 2006;26:421-4.
23. Zervos M, Mandell LA, Vrooman PS, et al. Comparative efficacies and tolerabilities of intravenous azithromycin plus ceftriaxone and intravenous levofloxacin with step-down oral therapy for hospitalized patients with moderate to severe community-acquired pneumonia. *Treat Respir Med* 2004;3:329-36.
